# Supplementary material for: Motility in Periweissella Species: Genomic and Phenotypic Characterization and Update on Motility in Lactobacillaceae
Source: MDPI journal article supplement (doi:10.3390/microorganisms11122923), 2023-12-05
Supplement: s1 [file s1]

**Supplementary Table S1.** List of *Lactobacillaceae* type strains and WGS reference accession used in this study

| <b>genus</b>         | <b>species</b>                     | <b>type strain</b>      | <b>Reference Accession</b> |
|----------------------|------------------------------------|-------------------------|----------------------------|
| <i>Periweissella</i> | <i>Periweissella beninensis</i>    | LMG 25373 <sup>T</sup>  | JAGMVS010000000            |
|                      | <i>Periweissella cryptocerci</i>   | 26KH-42 <sup>T</sup>    | NZ_CP037940.1              |
|                      | <i>Periweissella fabalis</i>       | LMG 26217 <sup>T</sup>  | JAGMVU010000000            |
|                      | <i>Periweissella fabaria</i>       | LMG 24286 <sup>T</sup>  | JAGMVB010000000            |
|                      | <i>Periweissella ghanensis</i>     | DSM 19935 <sup>T</sup>  | JAGMVW010000000            |
| <i>Weissella</i>     | <i>Weissella bombi</i>             | DSM 28794 <sup>T</sup>  | NZ_FMAO000000000.1         |
|                      | <i>Weissella ceti</i>              | CCUG 59653 <sup>T</sup> | NZ_ANCA010000000.1         |
|                      | <i>Weissella cibaria</i>           | CCUG 41967 <sup>T</sup> | NZ_VNGZ010000000.1         |
|                      | <i>Weissella coleopterum</i>       | HDW19 <sup>T</sup>      | NZ_CP049888.1              |
|                      | <i>Weissella confusa</i>           | ATCC 10881 <sup>T</sup> | NZ_CP027563.1              |
|                      | <i>Weissella diestrammenae</i>     | DSM 27940 <sup>T</sup>  | JAGMVT010000000            |
|                      | <i>Weissella fangxianensis</i>     | HBUAS51963 <sup>T</sup> | JAMXDB000000000.1          |
|                      | <i>Weissella halotolerans</i>      | ATCC 35410 <sup>T</sup> | NZ_ATUU010000000.1         |
|                      | <i>Weissella hellenica</i>         | ATCC 51523 <sup>T</sup> | NZ_JAAXPM010000000.1       |
|                      | <i>Weissella jogaejeotgali</i>     | FOL01 <sup>T</sup>      | NZ_CP014332.1              |
|                      | <i>Weissella kandleri</i>          | ATCC 51149 <sup>T</sup> | NZ_JQBP010000000.1         |
|                      | <i>Weissella koreensis</i>         | CCUG 47134 <sup>T</sup> | NZ_AKGG010000000.1         |
|                      | <i>Weissella minor</i>             | ATCC 35412 <sup>T</sup> | NZ_JQCD010000000.1         |
|                      | <i>Weissella muntiaci</i>          | 8 H-2 <sup>T</sup>      | NZ_SDGZ010000000.1         |
|                      | <i>Weissella oryzae</i>            | DSM 25784 <sup>T</sup>  | NZ_DF820484.1              |
|                      | <i>Weissella paramesenteroides</i> | ATCC 33313 <sup>T</sup> | ACKU010000000.1            |
|                      | <i>Weissella sagaensis</i>         | CCM 8924 <sup>T</sup>   | BLKA01000001.1             |
|                      | <i>Weissella soli</i>              | CCUG 46608 <sup>T</sup> | NZ_CP017326.1              |
|                      | <i>Weissella thailandensis</i>     | CCUG 46557 <sup>T</sup> | NZ_BJEC010000000.1         |
|                      | <i>Weissella uvarum</i>            | B18NM42 <sup>T</sup>    | JAGMVX010000000            |
|                      | <i>Weissella viridescens</i>       | ATCC 12706 <sup>T</sup> | NZ_CP061835.1              |
| <i>Lactobacillus</i> | <i>Lactobacillus rogosae</i>       | ATCC 27753 <sup>T</sup> | FONU01000000               |

|                             |                                         |                         |              |
|-----------------------------|-----------------------------------------|-------------------------|--------------|
| <i>Latilactobacillus</i>    | <i>Latilactobacillus curvatus</i>       | DSM 20089 <sup>T</sup>  | AZDL00000000 |
| <i>Ligilactobacillus</i>    | <i>Ligilactobacillus acidipiscis</i>    | DSM 15836 <sup>T</sup>  | AZFI00000000 |
|                             | <i>Ligilactobacillus agilis</i>         | DSM 20509 <sup>T</sup>  | AYYP00000000 |
|                             | <i>Ligilactobacillus ruminis</i>        | DSM 20403 <sup>T</sup>  | AYYL00000000 |
|                             | <i>Ligilactobacillus salitolerans</i>   | DSM 103433 <sup>T</sup> | BFFP01000000 |
| <i>Liquorilactobacillus</i> | <i>Liquorilactobacillus aquaticus</i>   | DSM 21051 <sup>T</sup>  | AYZD00000000 |
|                             | <i>Liquorilactobacillus cacaonum</i>    | DSM 21116 <sup>T</sup>  | AYZE00000000 |
|                             | <i>Liquorilactobacillus capillatus</i>  | DSM 19910 <sup>T</sup>  | AZEF00000000 |
|                             | <i>Liquorilactobacillus ghanensis</i>   | DSM 18630 <sup>T</sup>  | AZGB00000000 |
|                             | <i>Liquorilactobacillus hordei</i>      | DSM 19519 <sup>T</sup>  | AZDX00000000 |
|                             | <i>Liquorilactobacillus mali</i>        | DSM 20444 <sup>T</sup>  | AYYH00000000 |
|                             | <i>Liquorilactobacillus nagelii</i>     | DSM 13675 <sup>T</sup>  | AZEV00000000 |
|                             | <i>Liquorilactobacillus oeni</i>        | DSM 19972 <sup>T</sup>  | AZEH00000000 |
|                             | <i>Liquorilactobacillus satsumensis</i> | DSM 16230 <sup>T</sup>  | AZFQ00000000 |
|                             | <i>Liquorilactobacillus sucicola</i>    | DSM 21376 <sup>T</sup>  | AYZF00000000 |
|                             | <i>Liquorilactobacillus uvarum</i>      | DSM 19971 <sup>T</sup>  | AZEG00000000 |
|                             | <i>Liquorilactobacillus vini</i>        | DSM 20605 <sup>T</sup>  | AYYX00000000 |
