# Supplementary figures and images for: Motility in Periweissella Species: Genomic and Phenotypic Characterization and Update on Motility in Lactobacillaceae
Source: MDPI journal article supplement (doi:10.3390/microorganisms11122923), 2023-12-05

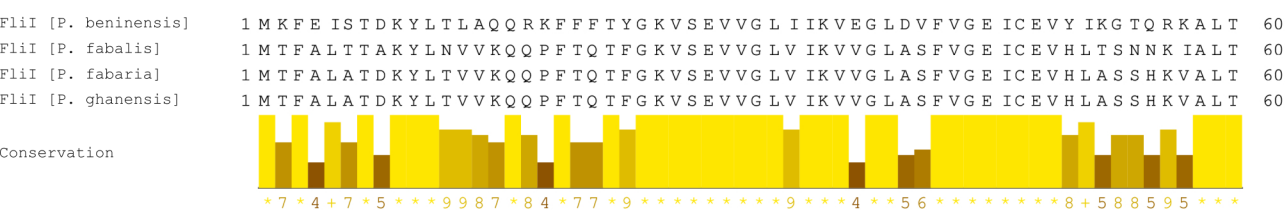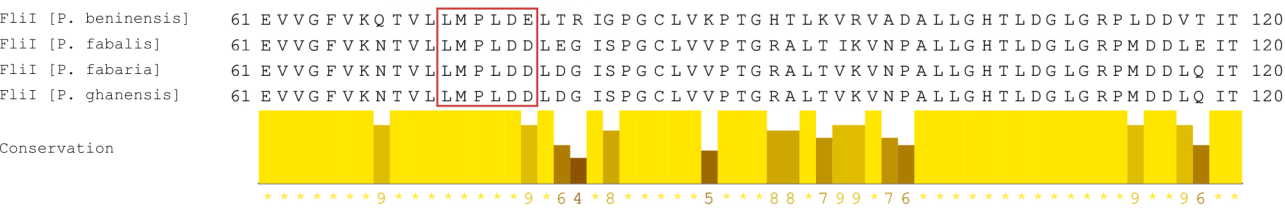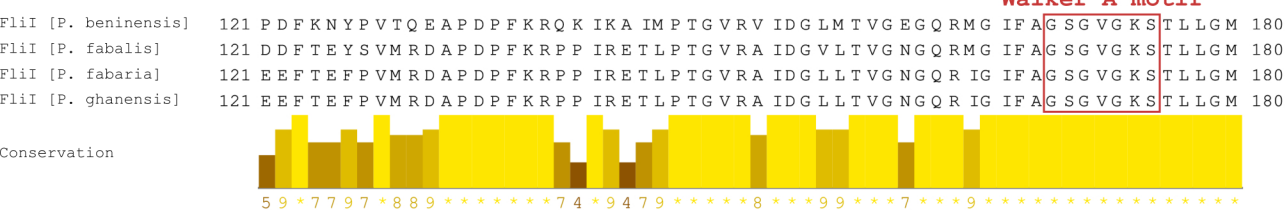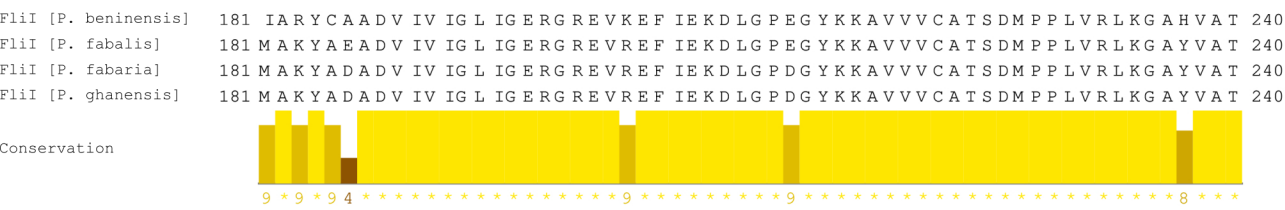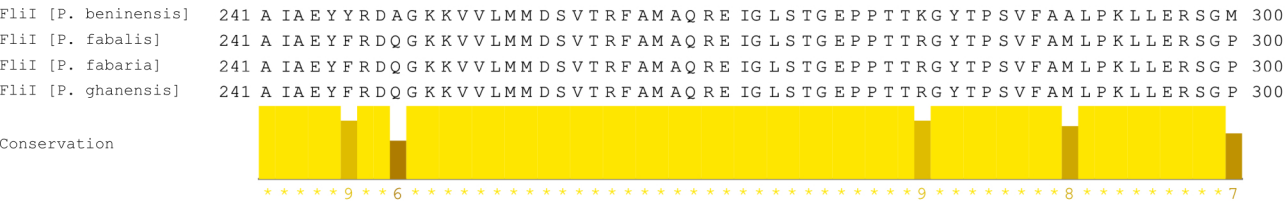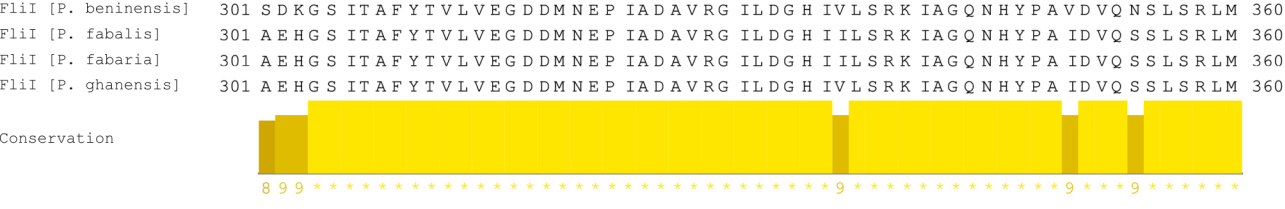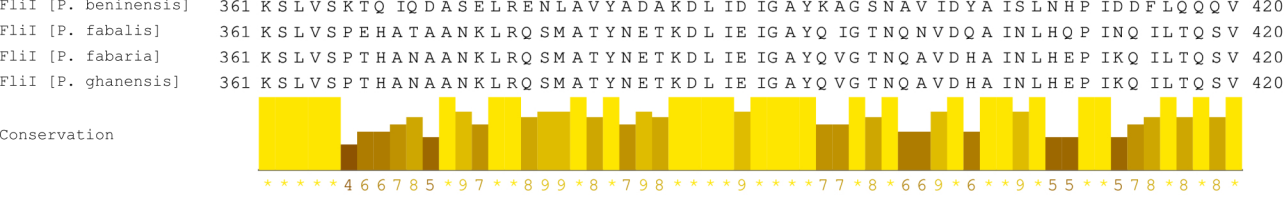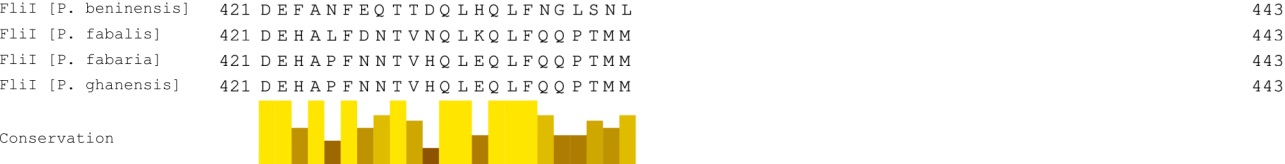

Supplement: s1 [file s1]

Tree scale: 0.1

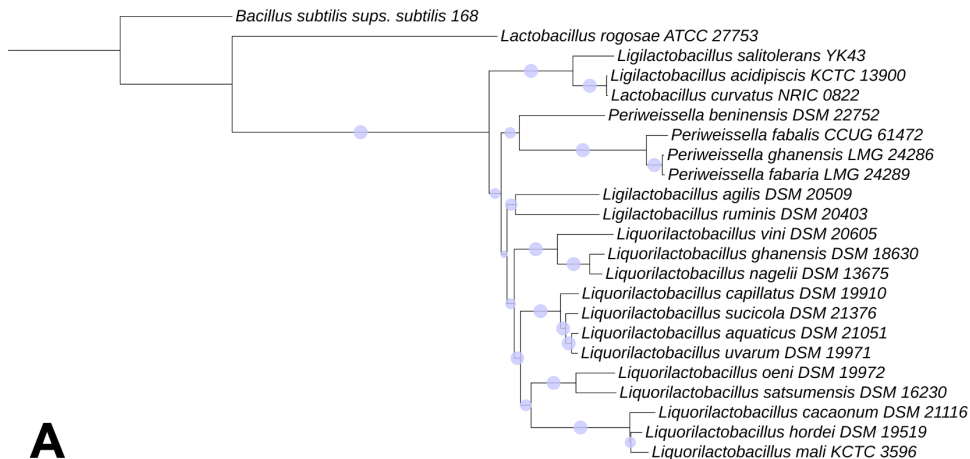

A

Tree scale: 1

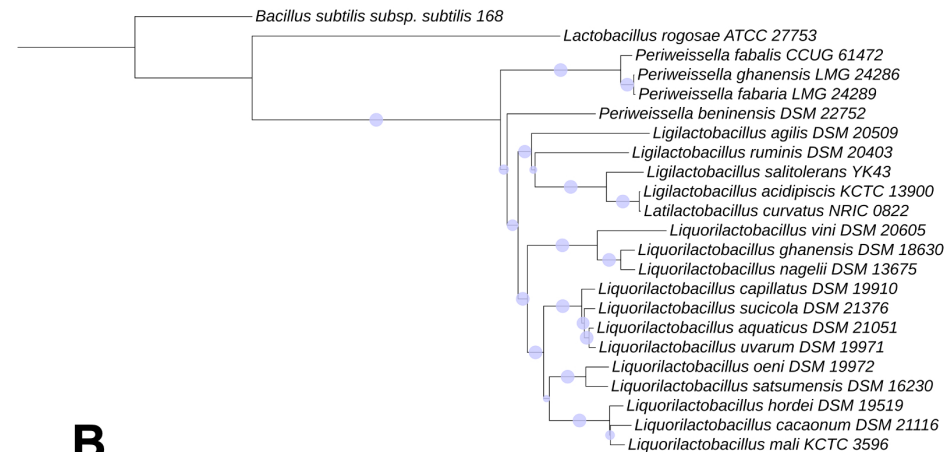

B

Tree scale: 1

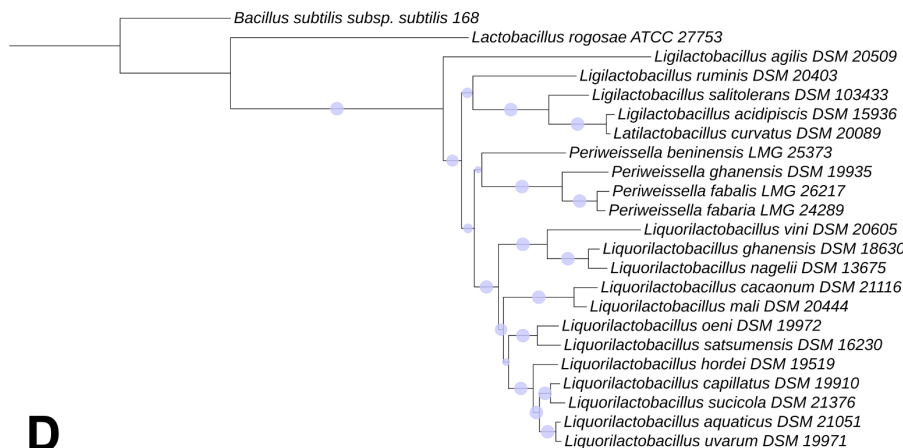

C

Tree scale: 1

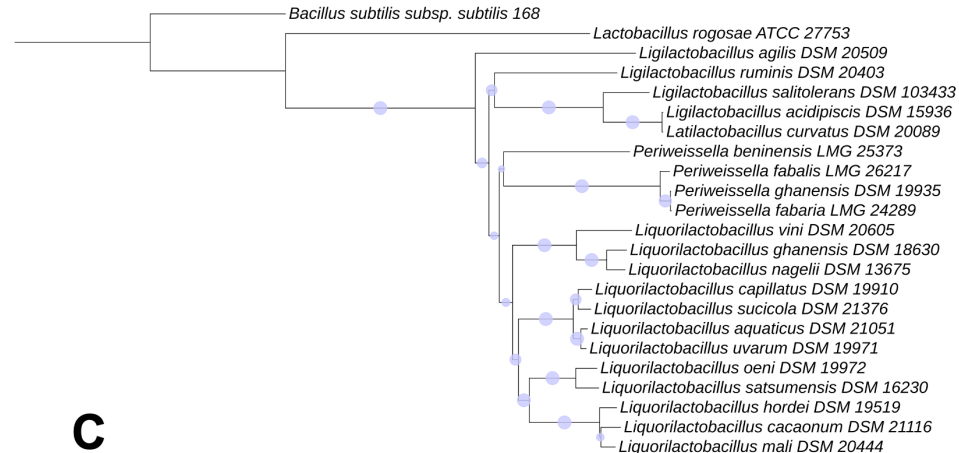

D

Supplement: s1 [file s1]
